# Supplementary material
Source: HighWire-hosted journal article supplement (https://bmjopen.bmj.com/content/10/2/e033186)

ONLINE SUPPLEMENTARY APPENDIX

Table A1: Rates of community asset participation over time

|                                                                        | Baseline (%) | 6 months (%) | 12 months (%) | 18 months (%) |
|------------------------------------------------------------------------|--------------|--------------|---------------|---------------|
| Participation in community assets                                      | 53           | 57           | 58            | 59            |
| Type of asset:                                                         |              |              |               |               |
| Group for elderly or older people (e.g. lunch club)                    | 11           | 12           | 12            | 13            |
| Education, arts, music or singing group (including evening classes)    | 8            | 9            | 9             | 10            |
| Religious group or church organisation                                 | 20           | 20           | 20            | 20            |
| Charity, voluntary or community group                                  | 15           | 15           | 14            | 15            |
| Social club (including WMCs, Rotary Clubs, etc.)                       | 14           | 17           | 18            | 19            |
| Sports club, gym, exercise, or dance group                             | 21           | 22           | 23            | 26            |
| Other group or organisation                                            | 18           | 20           | 20            | 20            |
|                                                                        |              |              |               |               |
| I don't regularly join in any of the activities of these organisations | 47           | 43           | 42            | 41            |
|                                                                        |              |              |               |               |

Notes: based on the fixed sample of N=2,449 individuals included in the primary analysis. Numbers sum to more than 100% as respondents can tick more than one option

**Table A2:** Variable definitions and summary statistics

| Variable description | Possible Responses                                             | How included                                                                                         | Treatment and/or Outcome Equation | Mean | Std. Dev. | Min. | Max. |
|----------------------|----------------------------------------------------------------|------------------------------------------------------------------------------------------------------|-----------------------------------|------|-----------|------|------|
| Sex                  | Male or female                                                 | As a binary variable (Female=1; male=0)                                                              | Treatment and Outcome equations   | 0.52 |           | 0    | 1    |
| Age                  | Given in years                                                 | Created a series of 5-year age bands and included these as binary variables. Reference is age 65-69. | Treatment and Outcome equations   |      |           |      |      |
|                      |                                                                | Age 65 - 69                                                                                          |                                   | 0.32 |           | 0    | 1    |
|                      |                                                                | Age 70 - 74                                                                                          |                                   | 0.28 |           | 0    | 1    |
|                      |                                                                | Age 75 - 79                                                                                          |                                   | 0.21 |           | 0    | 1    |
|                      |                                                                | Age 80 - 84                                                                                          |                                   | 0.12 |           | 0    | 1    |
|                      |                                                                | Age 85 - 98                                                                                          |                                   | 0.07 |           | 0    | 1    |
| Living arrangements  | Live alone; live with spouse; live with other                  | Created a series of binary variables. Reference is live alone.                                       | Treatment and Outcome equations   |      |           |      |      |
|                      |                                                                | Live alone                                                                                           |                                   | 0.35 |           | 0    | 1    |
|                      |                                                                | Live with spouse                                                                                     |                                   | 0.59 |           | 0    | 1    |
|                      |                                                                | Live with other                                                                                      |                                   | 0.06 |           | 0    | 1    |
| Employment status    | Economically active; not economically active or retired; Other | Created a series of binary variables. Reference is economically active.                              | Treatment and Outcome equations   |      |           |      |      |
|                      |                                                                | Economically active                                                                                  |                                   | 0.06 |           | 0    | 1    |
|                      |                                                                | Retired or not economically active                                                                   |                                   | 0.93 |           | 0    | 1    |
|                      |                                                                | Other (inc. unemployed)                                                                              |                                   | 0.01 |           | 0    | 1    |
| Highest educational  | Degree; 1 or more A-levels (or                                 | Created a series of binary                                                                           | Treatment and Outcome             |      |           |      |      |

|                                          |                                                                                                                                              |                                                                                                      |                                 |      |      |   |   |
|------------------------------------------|----------------------------------------------------------------------------------------------------------------------------------------------|------------------------------------------------------------------------------------------------------|---------------------------------|------|------|---|---|
| attainment                               | equivalent); 1 or more GCSEs (or equivalent); NVQ qualification; other trade qualification; professional qualification; no qualifications.11 | variables. Reference is no qualifications.                                                           | equations                       |      |      |   |   |
|                                          |                                                                                                                                              | No qualifications                                                                                    |                                 | 0.38 |      | 0 | 1 |
|                                          |                                                                                                                                              | School level Qualifications                                                                          |                                 | 0.24 |      | 0 | 1 |
|                                          |                                                                                                                                              | College level Qualifications                                                                         |                                 | 0.09 |      | 0 | 1 |
|                                          |                                                                                                                                              | University level Qualifications                                                                      |                                 | 0.07 |      | 0 | 1 |
|                                          |                                                                                                                                              | NVQ and Trade Qualifications                                                                         |                                 | 0.07 |      | 0 | 1 |
|                                          |                                                                                                                                              | Professional Qualifications                                                                          |                                 | 0.15 |      | 0 | 1 |
| Presence of limiting health conditions   | Shown a list of 23 health conditions and asked how much they limit daily activity.                                                           | Create 23 binary variables =1 if condition limits daily activity by 4 or 5 (out of 5); =0 otherwise. | Treatment and Outcome equations |      |      |   |   |
| EQ5D domain values                       | Include the responses to the 5 domains of the EQ5D questions.                                                                                | Included as four binary variables for each domain. In each domain, the reference is 'no problem'.    | Treatment equation only         |      |      |   |   |
| ICECAP-O score                           | Scored using the algorithm in Coast et al. <sup>1</sup>                                                                                      | As a continuous variable.                                                                            | Treatment equation only         | 0.83 | 0.15 | 0 | 1 |
| Satisfaction with transport              | Very dissatisfied; dissatisfied; neither; satisfied; very satisfied.                                                                         | Created a series of binary variables. Reference is very dissatisfied.                                | Treatment equation only         |      |      |   |   |
| Strength of social support (see note: A) | None of the time; a little of the time; some of the time; most of the time; all of the time.                                                 | For each question, created a series of binary variables. Reference is none of the time.              | Treatment equation only         |      |      |   |   |

|                                                                                 |                                                                                                                                                                                                                                                                                                                                                                                                                                                                                                                                                                                                            |                                                                                               |                         |         |         |      |        |
|---------------------------------------------------------------------------------|------------------------------------------------------------------------------------------------------------------------------------------------------------------------------------------------------------------------------------------------------------------------------------------------------------------------------------------------------------------------------------------------------------------------------------------------------------------------------------------------------------------------------------------------------------------------------------------------------------|-----------------------------------------------------------------------------------------------|-------------------------|---------|---------|------|--------|
| Distance to nearest asset                                                       | Calculated in miles (see note: B)                                                                                                                                                                                                                                                                                                                                                                                                                                                                                                                                                                          | As a continuous variable. Also include the squared term to allow for non-linear relationship. | Treatment equation only | 0·16    | 0·19    | 0·00 | 2·93   |
| Total cost of health care services used in the 6-month period prior to baseline | Calculated as the sum of costs for different health care services.                                                                                                                                                                                                                                                                                                                                                                                                                                                                                                                                         | As a continuous variable.                                                                     | Treatment equation only | 1661·73 | 2072·78 | 0·00 | 32,154 |
|                                                                                 |                                                                                                                                                                                                                                                                                                                                                                                                                                                                                                                                                                                                            |                                                                                               |                         |         |         |      |        |
| N= 2,449 (complete case sample).                                                |                                                                                                                                                                                                                                                                                                                                                                                                                                                                                                                                                                                                            |                                                                                               |                         |         |         |      |        |
| Note A:                                                                         | We consider six questions: (1) Is there someone available to you whom you can count on to listen to you when you need to talk? (2) Is there someone available to give you good advice about a problem? (3) Is there someone available who shows you love and affection? (4) Is there someone available to help you with daily chores? (5) Can you count on anyone to provide you with emotional support (talking over problems or helping you make a difficult decision)? (6) Do you have as much contact as you would like with someone who you feel close to, someone in whom you can trust and confide? |                                                                                               |                         |         |         |      |        |
| Note B:                                                                         | We supplement the CLASSIC data with a dataset provided by Salford Council which contains the geo-coordinates of all community assets within the Salford area. As we have home postcodes for respondents, we use these two pieces of information to calculate the minimum distance to the nearest asset using 'as the crow flies' straight-line distances.                                                                                                                                                                                                                                                  |                                                                                               |                         |         |         |      |        |
|                                                                                 |                                                                                                                                                                                                                                                                                                                                                                                                                                                                                                                                                                                                            |                                                                                               |                         |         |         |      |        |

## Reference

1. Coast J, Flynn TN, Natarajan L, Sproston K, Lewis J, Louviere JJ, et al. Valuing the ICECAP capability index for older people. *Soc Sci Med* 1982. 2008 Sep;67(5):874–82.

| Table A3: Determinants of drop-out (including mortality) |                     |                  |                        |                                                 |         |                 |
|----------------------------------------------------------|---------------------|------------------|------------------------|-------------------------------------------------|---------|-----------------|
|                                                          | Main effect         |                  |                        | Interaction effect with BL participation status |         |                 |
|                                                          | Effect <sup>#</sup> | p-value          | 95% CI                 | Effect <sup>#</sup>                             | p-value | 95% CI          |
| EQ5D Health Utility Index                                | -0.109              | 0.068            | [-0.225, 0.008]        | -0.046                                          | 0.641   | [-0.240, 0.148] |
| Participate in CAs as baseline                           | 0.083               | 0.510            | [-0.164, 0.330]        | N/A                                             |         |                 |
| Male                                                     | Reference category  |                  |                        |                                                 |         |                 |
| Female                                                   | -0.001              | 0.976            | [-0.052, 0.051]        | -0.014                                          | 0.714   | [-0.090, 0.061] |
| Age 65 - 69                                              | Reference category  |                  |                        |                                                 |         |                 |
| Age 70 - 74                                              | 0.034               | 0.295            | [-0.029, 0.097]        | -0.004                                          | 0.926   | [-0.099, 0.090] |
| Age 75 - 79                                              | 0.033               | 0.346            | [-0.036, 0.102]        | 0.016                                           | 0.758   | [-0.086, 0.118] |
| Age 80 - 84                                              | <b>0.084</b>        | <b>0.037</b>     | <b>[0.005, 0.162]</b>  | 0.023                                           | 0.706   | [-0.095, 0.141] |
| Age 85 - 98                                              | <b>0.185</b>        | <b>&lt;0.001</b> | <b>[0.093, 0.278]</b>  | 0.063                                           | 0.367   | [-0.074, 0.200] |
| Live alone                                               | Reference category  |                  |                        |                                                 |         |                 |
| Live with spouse                                         | 0.030               | 0.240            | [-0.020, 0.081]        | -0.045                                          | 0.242   | [-0.119, 0.030] |
| Live with other                                          | 0.049               | 0.177            | [-0.022, 0.120]        | 0.047                                           | 0.387   | [-0.060, 0.155] |
| Economically active                                      | Reference category  |                  |                        |                                                 |         |                 |
| Retired or not economically active                       | 0.019               | 0.736            | [-0.092, 0.130]        | -0.133                                          | 0.102   | [-0.292, 0.027] |
| Other (inc. unemployed)                                  | 0.169               | 0.143            | [-0.057, 0.396]        | -0.168                                          | 0.362   | [-0.530, 0.193] |
| No qualifications                                        | Reference category  |                  |                        |                                                 |         |                 |
| School level Qualifications                              | <b>-0.073</b>       | <b>0.049</b>     | <b>[-0.145, 0.000]</b> | -0.037                                          | 0.453   | [-0.134, 0.060] |
| College level Qualifications                             | -0.040              | 0.570            | [-0.177, 0.097]        | -0.073                                          | 0.407   | [-0.246, 0.100] |
| University level Qualifications                          | -0.068              | 0.303            | [-0.196, 0.061]        | 0.073                                           | 0.392   | [-0.094, 0.241] |
| NVQ and Trade Qualifications                             | -0.107              | 0.062            | [-0.219, 0.005]        | 0.126                                           | 0.096   | [-0.022, 0.274] |
| Professional Qualifications                              | -0.064              | 0.058            | [-0.129, 0.002]        | 0.068                                           | 0.153   | [-0.025, 0.161] |
| <i>Presence of limiting condition</i>                    |                     |                  |                        |                                                 |         |                 |
| Asthma                                                   | -0.025              | 0.687            | [-0.149, 0.098]        | 0.001                                           | 0.991   | [-0.215, 0.217] |
| Cancer                                                   | 0.127               | 0.157            | [-0.049, 0.304]        | -0.072                                          | 0.642   | [-0.373, 0.230] |
| Back pain/Sciatica                                       | -0.034              | 0.378            | [-0.109, 0.041]        | -0.015                                          | 0.812   | [-0.139, 0.109] |
| Bronchitis/COPD                                          | <b>0.134</b>        | <b>0.008</b>     | <b>[0.035, 0.234]</b>  | -0.064                                          | 0.452   | [-0.231, 0.103] |
| Kidney disease                                           | 0.103               | 0.351            | [-0.113, 0.319]        | -0.082                                          | 0.722   | [-0.531, 0.368] |
| Colon/Irritable bowel                                    | -0.079              | 0.204            | [-0.202, 0.043]        | 0.069                                           | 0.477   | [-0.121, 0.258] |
| Congestive heart failure                                 | 0.090               | 0.316            | [-0.086, 0.265]        | 0.128                                           | 0.347   | [-0.139, 0.396] |
| Diabetes                                                 | -0.064              | 0.301            | [-0.185, 0.057]        | 0.122                                           | 0.225   | [-0.075, 0.319] |
| Hard of hearing                                          | 0.059               | 0.163            | [-0.024, 0.141]        | -0.011                                          | 0.866   | [-0.138, 0.116] |
| Heart disease/angina                                     | 0.039               | 0.449            | [-0.063, 0.141]        | -0.092                                          | 0.305   | [-0.268, 0.084] |
| High blood pressure                                      | 0.101               | 0.081            | [-0.012, 0.214]        | -0.093                                          | 0.343   | [-0.284, 0.099] |
| High cholesterol                                         | -0.095              | 0.141            | [-0.221, 0.031]        | 0.066                                           | 0.557   | [-0.154, 0.286] |
| Osteoarthritis                                           | 0.016               | 0.683            | [-0.060, 0.091]        | -0.050                                          | 0.415   | [-0.170, 0.070] |
| Osteoporosis                                             | 0.037               | 0.534            | [-0.079, 0.153]        | 0.074                                           | 0.442   | [-0.115, 0.264] |
| Overweight                                               | -0.090              | 0.101            | [-0.197, 0.017]        | 0.105                                           | 0.218   | [-0.062, 0.272] |
| Poor circulation in legs                                 | 0.067               | 0.101            | [-0.013, 0.147]        | -0.040                                          | 0.546   | [-0.171, 0.090] |
| Rheumatoid arthritis                                     | -0.028              | 0.549            | [-0.121, 0.064]        | 0.054                                           | 0.531   | [-0.115, 0.224] |
| Rheumatic disease                                        | 0.144               | 0.130            | [-0.042, 0.331]        | -0.349                                          | 0.102   | [-0.767, 0.069] |

|                            |        |       |                 |        |       |                 |
|----------------------------|--------|-------|-----------------|--------|-------|-----------------|
| Stomach problem/ulcer/etc. | -0.085 | 0.146 | [-0.199, 0.029] | 0.058  | 0.521 | [-0.118, 0.233] |
| Stroke                     | 0.103  | 0.229 | [-0.065, 0.270] | -0.016 | 0.898 | [-0.262, 0.230] |
| Thyroid disorder           | 0.081  | 0.343 | [-0.087, 0.249] | -0.086 | 0.488 | [-0.331, 0.158] |
| Problems with vision       | 0.060  | 0.206 | [-0.033, 0.153] | -0.102 | 0.168 | [-0.247, 0.043] |
| Other conditions           | 0.001  | 0.993 | [-0.125, 0.126] | 0.165  | 0.076 | [-0.017, 0.347] |

#: marginal effects following logistic regression of drop out, calculated at the mean of the variables. **Bold indicates statistical significance at  $p < 0.05$ .**

**Table A4:** Effect of community asset participation on outcomes - non-balanced sample

|                                    | (1)<br>QALYs                 | (2)<br>Cumulative cost (£)     | (3)<br>Net-benefit (£)            |
|------------------------------------|------------------------------|--------------------------------|-----------------------------------|
| <i><u>Uptake</u></i>               |                              |                                |                                   |
| BL vs. FU6<br>(Treated: 325/1426)  | 0.011<br>[0.004 to 0.019]    | -135.86<br>[-445.89 to 174.16] | 224.89<br>[36.75 to 413.04]       |
| BL vs. FU12<br>(Treated: 189/1025) | 0.027<br>[0.006 to 0.048]    | -107.95<br>[-224.46 to 8.57]   | 641.07<br>[118.98 to 1163.17]     |
| <i><u>Cessation</u></i>            |                              |                                |                                   |
| BL vs. FU6<br>(Treated: 208/1513)  | -0.009<br>[-0.016 to -0.001] | 211.38<br>[-74.78 to 497.55]   | -300.50<br>[-581.85 to -19.15]    |
| BL vs. FU12<br>(Treated: 106/1212) | -0.012<br>[-0.002 to -0.001] | 1127.43<br>[258.87 to 2195.98] | -1473.35<br>[-2828.49 to -118.21] |

Notes: Net benefit calculations assume a threshold value of 20k per-annum (hence 10k per 6 months). BL vs. 6 months compares NN (control group) to NY (treatment group). BL vs. 12 months compares NNN (control group) to NYYY (treatment group). BL vs. FU18 compares NNNN (control group) to NYYYY (treatment group).

Variables in the outcome equation: Gender, age (in 5-year groups), living arrangements, employment status, education, presence of limiting conditions. Variables in the matching equation: Gender, age (in 5-year groups), living arrangements, employment status, education, presence of limiting conditions, satisfied with transport, EQ5D domains scores (not utility value), 6 questions from the Social Support Inventory, distance to nearest community asset, cost of health care services in previous 6 months (before baseline).

**Table A5:** The effect of community asset participation changes on health outcomes given less stringent definition of uptake or cessation

|                             | (1)<br>QALYs       | (2)<br>Cumulative cost (£) | (3)<br>Net-benefit (£) |
|-----------------------------|--------------------|----------------------------|------------------------|
| <i>Panel (a): Uptake</i>    |                    |                            |                        |
| BL vs. FU12                 | 0.027              | -61.34                     | 498.93                 |
| (NNN vs. N#Y)               | [0.003 to 0.052]   | [-502.42 to 379.73]        | [29.30 to 968.55]      |
| (775 vs. 277)               | (p=0.027)          | (p=0.785)                  | (p=0.037)              |
| BL vs. FU18                 | 0.049              | -230.07                    | 1672.05                |
| (NNNN vs N##Y)              | [0.009 to 0.090]   | [-846.17 to 386.03]        | [215.42 to 3128.68]    |
| (693 vs. 315)               | (p=0.017)          | (p=0.464)                  | (p=0.024)              |
| <i>Panel (b): Cessation</i> |                    |                            |                        |
| BL vs. FU12                 | -0.049             | 1081.12                    | -2121.45               |
| (YYY vs. Y#N)               | [-0.077 to -0.022] | [149.56 to 2012.68]        | [-3315.34 to -927.57]  |
| (1060 vs 169)               | (p<0.001)          | (p=0.023)                  | (p<0.001)              |
| BL vs. FU18                 | -0.034             | 337.74                     | -1240.15               |
| (YYYY vs. Y##N)             | [-0.065 to -0.003] | [62.68 to 612.80]          | [-2268.79 to -211.51]  |
| (1012 vs. 170)              | (p=0.031)          | (p=0.016)                  | (p=0.018)              |

Notes: Net benefit calculations assume a threshold value of 20k per-annum (hence 10k per 6 months and 30k for 18 months). Each panel shows the treatment and control groups, along with sample sizes. Variables in the outcome equation: Gender, age (in 5-year groups), living arrangements, employment status, education, presence of limiting conditions. Variables in the matching equation: Gender, age (in 5-year groups), living arrangements, employment status, education, presence of limiting conditions, satisfied with transport, EQ5D domains scores (not utility value), 6 questions from the Social Support Inventory, distance to nearest community asset, cost of health care services in previous 6 months (before baseline).

**Figure A1:** Density plots of propensity scores before and after matching

**Panel (a):** Uptake analysis

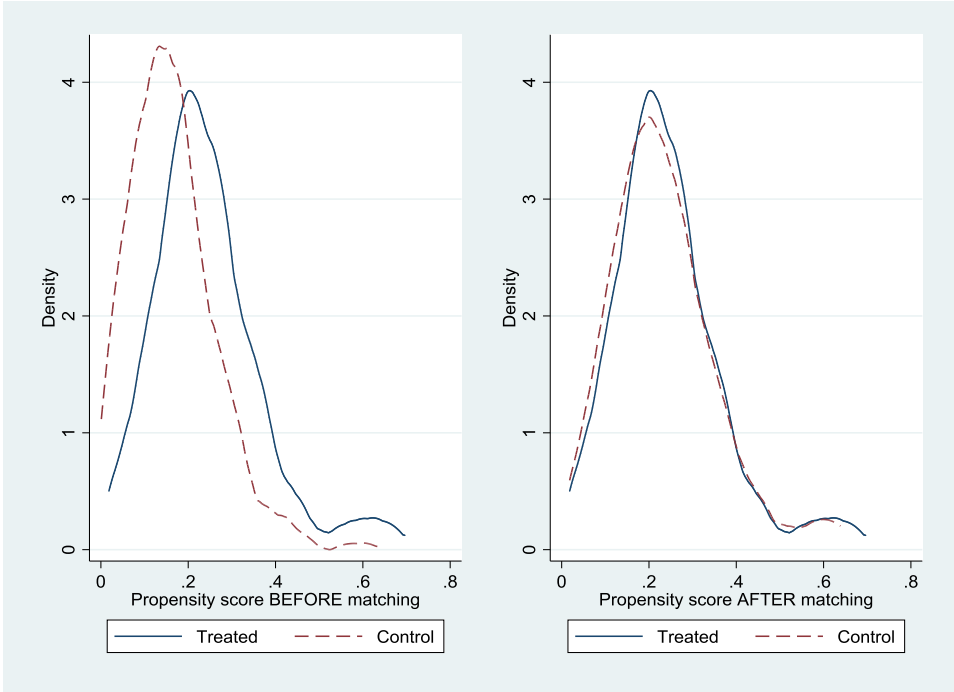

**Panel (b):** Cessation analysis

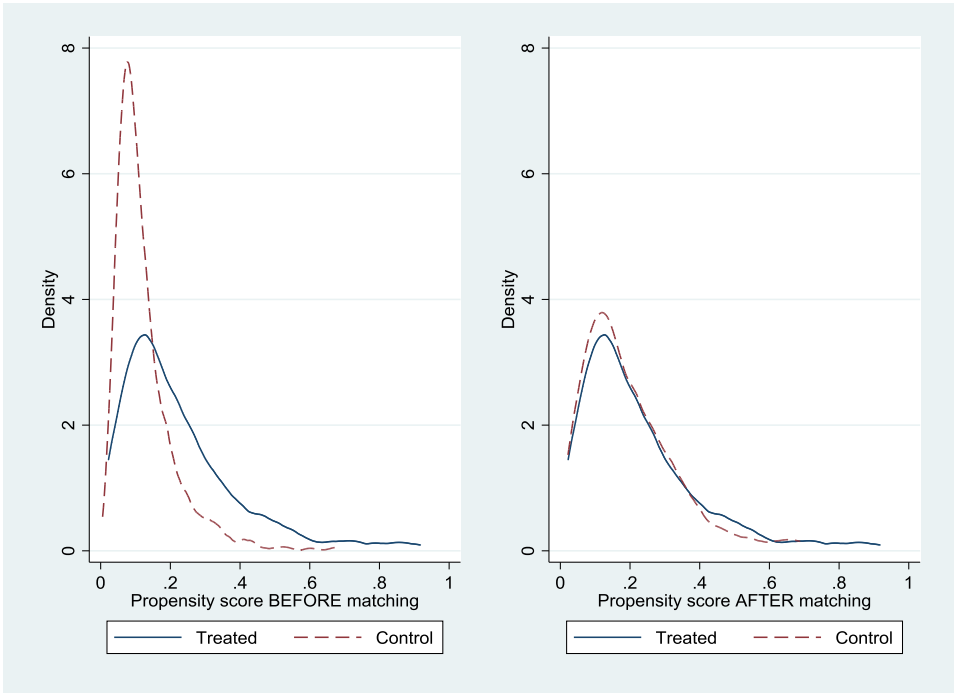

Supplement: inline-supplementary-material-1 [file inline-supplementary-material-1.pdf]
